# Supplementary material for: A physics informed neural network approach to quantify antigen presentation activities at single cell level using omics data
Source: Research Square preprint supplement (doi:10.21203/rs.3.rs-5629379/v1), 2025-01-17
Supplement: Supplementary file 2 [file 7f37adedf066a0c0b496587e.xlsx]

## Sheet: Supplementary Table S6
Predicted genes that have positive impact to the salvage step in the MHC class I antigen presentation pathway.
					p-value
	COAD	BRCA	HNSC	KIRC	KIRP	LUAD	PRAD	STAD	THCA
AFF4	1.45473e-09	1.67547e-15	0.0313167	6.36883e-90	2.82507e-37	2.8857e-14	1.73737e-07	0.908056	1
ITSN1	0.000313237	1.18844e-36	0.352773	2.15149e-92	1.62876e-46	2.43644e-25	2.97074e-13	4.09003e-30	8.7254e-06
PBRM1	0.581909	9.61646e-22	1	2.28767e-68	6.48123e-45	3.09251e-13	2.23303e-11	1.92772e-16	1.07873e-05
PIK3C2A	1.73364e-07	1.23162e-38	1	3.46388e-89	2.33772e-44	2.53357e-20	4.74673e-11	4.85859e-06	0.0134139
TTC3	0.046296	7.86412e-14	0.080268	1.30262e-45	1.27197e-40	2.33421e-11	1	0.129962	0.163488
ZCCHC14	1	4.88701e-16	0.0560913	1.94592e-106	2.22187e-13	4.19305e-15	5.97873e-06	1.155e-08	1
PRKAA1	1.64174e-06	0.000301055	0.750835	4.60955e-142	1.35267e-48	0.00157008	5.09492e-07	1.51537e-21	0.503157
GLS	5.4469e-06	5.50528e-42	0.427476	4.46438e-41	1.39376e-49	2.92112e-09	6.78856e-14	4.14736e-08	2.81499e-08
AKAP11	8.72245e-08	1.30316e-17	0.0173193	3.17184e-62	1.40468e-35	9.82656e-15	1.1537e-08	0.867334	1
GAAM1	0.000375179	2.99316e-39	0.056598	1.78151e-96	5.22209e-35	6.58282e-23	5.19794e-14	2.14687e-18	9.78781e-08
SOS2	0.00685579	1.69428e-28	0.904014	1.2341e-60	1.28981e-38	1.09046e-29	0.00668669	0.000126268	6.6359e-06
NR2F2	1.50263e-08	3.07752e-34	1	3.00791e-50	1.51348e-47	1.83479e-27	5.59216e-09	1.18391e-21	0.038058
