# Supplementary material for: A physics informed neural network approach to quantify antigen presentation activities at single cell level using omics data
Source: Research Square preprint supplement (doi:10.21203/rs.3.rs-5629379/v1), 2025-01-17
Supplement: Supplementary file 3 [file 93770ea25c51f051a044d3c1.xlsx]

## Sheet: Supplementary Table S3
Top genes that contribute to the MHC class II antigen representation in different cell clusters.
	Cluster1_genelist	Cluster2_genelist	Cluster3_genelist
1	HLA.DRA	B2M	B2M
2	HLA.DRB1	CD74	CTSS
3	HLA.DPB1	HLA.DRA	CD74
4	HLA.DPA1	HLA.DMA.1	CTSZ
5	CD74	VPS13C	CTSB
6	B2M	HLA.DRB1	HLA.DMA.1
7	HLA.DQB1	RAB14	CTSZ.1
8	HLA.DQA1	HLA.DPA1	CTSC
9	HLA.DMA	HLA.DPB1	CTSH
10	HLA.DMB	CTSZ.1	HLA.DMB.1
11	CTSZ.1	HLA.DMB.1	CTSL
12	HLA.DMA.1	CTSC.1	CTSD
13	HLA.DMB.1	RAB7A	LGMN
14	CTSC.1	CTSS	CTSC.1
15	RAB7A	SERPINA1	VPS13C
16	CTSS	HLA.DQB1	HLA.DRA
17	VPS13C	TMED10	TPP1
18	CTSZ	CTSZ	RAB14
19	TMED2	RAB5C	HLA.DRB1
20	HLA.DOA	HLA.DMA	HLA.DPA1
21	RAB14	TMED2	HLA.DPB1
22	CD59	VPS35	RAB7A
23	TMED10	HLA.DQA1	SERPINA1
24	SERPINA1	EPS15	HLA.DOA.1
25	RAB5C	CTSB	CTSA
26	CTSH	APP	TMED2
27	HLA.DOA.1	RAB8A	CD59
28	CTSB	HLA.DMB	TMED10
29	SEC31A	CORO7	HLA.DQB1
30	VPS35	CTSC	VPS35
31	VMA21	SEC31A	EPS15
32	RAB8A	CTSH	RAB5C
33	VTI1B	ATP6AP1	HLA.DMA
34	CTSC	MON2	RAB8A
35	ATP6AP1	HLA.DOA.1	ATP6AP1
36	SEC13	RAB11A.1	HLA.DQA1
37	RAB11A	VMA21	SEC31A
38	RAB11A.1	CD59	APP
39	TMED7	SYS1	RAB11A.1
40	SAR1B	VTI1B	VMA21
41	HLA.DQB2	LMAN1	HLA.DMB
42	USO1	AP2A1	CORO7
43	SEC24D	RAB11A	AP2A1
44	AREG	WIPI1	SEC24A
45	APP	SAR1B	VTI1B
46	COMMD1	SEC24A	LMAN1
47	SEC24A	GRIPAP1	SAR1B
48	LMAN1	TMED7	TMED7
49	LGMN	USO1	WIPI1
50	CTSD	TPP1	SEC13
51	SEC23B	STX5	GOLGA2
52	STX5	SEC13	KIAA0368
53	RAB35	COMMD1	STX5
54	EPS15	SEC23B	MON2
55	TPP1	CTSL	SYS1
56	CTSL	GBF1	AREG
57	MCFD2	LGMN	CTSO
58	KIAA0368	GOLGA2	GBF1
59	VTI1A	SEC24D	USO1
60	AP2A1	VTI1A	SEC23B
61	YIPF6	CTSD	RAB11A
62	RAB5B	AREG	GRIPAP1
63	HLA.DOB	MCFD2	SEC24D
64	SYS1	SORL1	MCFD2
65	CORO7	KIAA0368	COMMD1
66	MON2	YIPF5	SORL1
67	GOLGA2	VPS13A	AP1AR
68	GRIPAP1	AP4M1	YIPF6
69	HLA.DOB.1	SEC23A	VTI1A
70	SEC23IP	RAB35	RAB35
71	HLA.DQA2	AP1AR	SEC24B
72	YIPF5	KIF16B	SORT1.1
73	SEC23A	YIPF6	VPS13A
74	GBF1	ZDHHC2	HLA.DOA
75	WIPI1	SEC23IP	SEC23A
76	USP6NL	HLA.DOA	KIF16B
77	SORL1	RAB5B	YIPF5
78	SEC24B	SEC24B	GOSR2
79	TGFA	CTSA	TGFA
80	STX17	KLHL20	SREBF2
81	GOSR2	STX17	ZDHHC2
82	SREBF1	SORT1.1	HLA.DOB.1
83	CTSA	SREBF2	STX17
84	HLA.DRB5	HLA.DOB.1	SEC24C
85	KIF16B	GOSR2	CTSK
86	SREBF2	USP6NL	SREBF1
87	SORT1	SREBF1	SORT1
88	SEC24C	TGFA	RAB5B
89	SORT1.1	SEC24C	USP6NL
90	SCAP	SGSM3	KLHL20
91	AP4M1	SORT1	SEC23IP
92	AP1AR	TEX261	CTSW
93	VPS13A	HLA.DOB	AP4M1
94	ZDHHC2	SCRIB	TEX261
95	SGSM3	CTSO	SGSM3
96	KLHL20	SCAP	KLHL12
97	CTSO	KLHL12	SCAP
98	CTSW	F5	SCRIB
99	KLHL12	CTSW	CTSF
100	TEX261	HLA.DQB2	CTSV
101	LMAN2L	HLA.DRB5	F8
102	SCRIB	COL7A1	LMAN2L
103	CTSF	SEC31B	HLA.DOB
104	CTSK	HLA.DQA2	F5
105	SEC31B	CTSK	HLA.DQB2
106	CNIH3	CTSF	HLA.DRB5
107	AKAP5	GRIP1	SEC31B
108	CNIH2	LMAN2L	CNIH3
109	F8	ARHGAP44	CNIH2
110	CTSV	CNIH2	HLA.DQA2
111	GRIP1	CTSV	NAPSA
112	CTSG	NAPSA	COL7A1
113	NAPSA	AKAP5	CTSG
114	COL7A1	F8	AKAP5
115	F5	VANGL2	GRIP1
116	FOLR1	LRRC7	FOLR1
117	GRIA1	CNIH3	GRIA1
118	PCSK9	NSG1	PCSK9
119	VANGL2	CTSG	VANGL2
120	ARHGAP44	FOLR1	ARHGAP44
121	LRRC7	GRIA1	LRRC7
122	NSG1	PCSK9	NSG1
