# Supplementary material for: A physics informed neural network approach to quantify antigen presentation activities at single cell level using omics data
Source: Research Square preprint supplement (doi:10.21203/rs.3.rs-5629379/v1), 2025-01-17
Supplement: Supplementary file 4 [file a5bb2ebb4bca46e1312c862d.xlsx]

## Sheet: Table Information
Supplemental Tables S2.	Curated MHC class II antigen presentation pathway and its factor graph representation.
Table S2.1	MHC class II antigen presentation pathway module information
Table S2.2	MHC class II antigen presentation pathway gene list

## Sheet: Table S2.1
MHC class II antigen presentation pathway module information
M_id	M_name	C_in	C_in_name	C_out	C_out_name	SM_id
M_1	Uptake of extracellular proteins into cell	Exogenous Protein	C00002_	Internalized Proteins	C00003_	1
M_2	Processing of internalized proteins in endosomal/lysosomal	Internalized Proteins	C00003_	Peptide	C00004_	1
M_3	Biosynthesis of MHC2 in ER	abchain	C00005_	MHC2	C00006_	1
M_4	Transport of MHC2 from RE to Golgi	MHC2	C00006_	MHC2_Golgi	C00007_	1
M_5	Transport of MHC2 from Golgi to Endosomes	MHC2_Golgi	C00007_	MHC2_endosomes	C00008_	2
M_6	Association of MHC2 with antigen	Peptide+MHC2_endosomes	C00004_+C00008_	Peptide MHC2 Complex	C00009_	3
M_7	Expression of Peptide MHC2 Complex to cell surface	Peptide MHC2 Complex	C00009_	Peptide MHC2 Complex2	C00011_	2

## Sheet: Table S2.2
MHC class II antigen presentation pathway gene list
M_1	COMMD1	RAB11A	RAB35	RAB5B	RAB5C	SGSM3	SORT1	USP6NL
M_2	CTSC	CTSB	CTSD	CTSE	CTSG	CTSH	CTSK	CTSL	CTSV	CTSO	CTSS	CTSW	CTSZ	CTSA	CTSF	NAPSA	LGMN	TPP1
M_3	HLA-DMA	HLA-DMB	HLA-DOA	HLA-DOB	HLA-DPA1	HLA-DPB1	HLA-DQA1	HLA-DQA2	HLA-DQB1	HLA-DQB2	HLA-DRA	HLA-DRB1	HLA-DRB3	HLA-DRB4	HLA-DRB5
M_4	SEC31B	AREG	GOLGA2	SEC31A	GOSR2	VTI1B	SEC13	LMAN1	GRIA1	APP	SREBF1	SEC23IP	SREBF2	SEC24B	SAR1B	TMED2	VTI1A	CNIH	KIAA0368	TMED10	CTSC	YIPF5	B2M	TEX261	YIPF6	VANGL2	SEC23A	F5	SEC24A	SCAP	KLHL12	USO1	CNIH3	STX5	CTSZ	SEC22B	TGFA	MCFD2	TMED7	SEC24D	SERPINA1	PCSK9	CNIH2	SEC24C	CD59	F8	SEC23B	COL7A1	LMAN2L
M_5	AP1AR	AP2A1	AP4M1	CORO7	DOP1A	DOP1B	EPS15	GBF1	KIF16B	KLHL20	MON2	RAB14	SORT1	SYS1	VPS13A	VPS13C	WIPI1
M_6	HLA-DMA	HLA-DMB	HLA-DOA	HLA-DOB
M_7	AKAP5	ARHGAP44	ATP6AP1	GRIP1	GRIP2	GRIPAP1	LRRC7	NSG1	RAB11A	RAB7A	RAB8A	SCRIB	SORL1	TAMALIN	TRARG1	VPS35	ZDHHC2
[truncated: 4 more columns]
