# Supplementary material for: A physics informed neural network approach to quantify antigen presentation activities at single cell level using omics data
Source: Research Square preprint supplement (doi:10.21203/rs.3.rs-5629379/v1), 2025-01-17
Supplement: Supplementary file 5 [file cebe4d90ed3ce49dc7cb26c9.xlsx]

## Sheet: Table Information
Supplemental Tables S1.	Curated MHC class I antigen presentation pathway and its factor graph representation.
Table S1.1	MHC class I antigen presentation pathway module information
Table S1.2	MHC class I antigen presentation pathway gene list

## Sheet: Table S1.1
MHC class I antigen presentation pathway module information
M_id	M_name	C_in	C_in_name	C_out	C_out_name	SM_id
M_1	E1_E2_E3	Self-protein	C00002_	Peptide1	C00003_	1
M_2	DEUB	Peptide1	C00003_	Protein	C00005_	1
M_3	26S PROTEASOME	Peptide1	C00003_	Peptide2	C00004_	1
M_4	MHC1	abchain	C00009_	MHC1	C00010_	2
M_5	PLC	Peptide2+MHC1	C00004_+C00010_	Peptide MHC1 Complex1	C00011_	3
M_6	ER_TO_GOLGI	Peptide MHC1 Complex1	C00011_	Peptide MHC1 Complex2	C00012_	4
M_7	GOLGI_TO_SURFACE	Peptide MHC1 Complex2	C00012_	Peptide MHC1 Complex3	C00013_	4
M_8	RECYCLE	Peptide MHC1 Complex3	C00013_	Recycle product	C00014_	4
M_9	T_cell	Peptide MHC1 Complex3	C00013_	T_cell	C00015_	4

## Sheet: Table S1.2
MHC class I antigen presentation pathway gene list
M_1	H1-9P	UBB	UBA52	UBA1	UBA7	UBA3	SETD2	UBA5	UBA6	ATG7	UBE2U	UBE2C	UBE2S	UBE2V1	UBE2J1	UBE2D3	UBE2H	UBE2L6	UBE2B	UBE2E1	UBE2D2	UBE2R2	UBA7	UBE2L3	UBE2K	UBE2Z	UBE2Q1	UBE2G2	UBE2Q2	UBE2G1	UBE2M	UBE2N	UBE2E3	UBE2A	CDC34	UBE2D1	UBE2V2	UBE2E2	UBE2O	UBE2J2	UBE2W	UBE2F	UBE2D4	ASB17	CBLL2	ASB10	ASB18	ASB11	FBXW10
M_2	VCPIP1	USP25	OTUB1	YOD1	USP5	USP19	ATXN3	OTUD5	OTUB2	OTUD7A	USP17L2	OTUD7B	USP20	TNFAIP3	USP33	OTUD4	USP37	USP34	BAP1	USP8
M_3	PSMA8	PSME1	PSMB4	PSMA7	PSMB7	PSMB1	PSMB3	PSMB6	PSMC3	PSMB5	PSMD2	PSMD4	PSMC4	PSME2	PSMC2	PSMA3	PSMB8	PSMC5	PSMD1	PSMF1	PSME3	PSMD3	PSMD13	PSMD7	PSMD10	PSMB2	ENSG00000041357	PSMA5	PSMB9	PSMD11	PSME4	PSMD5	PSMC6	PSMD12	PSMD6	PSMA1	PSMB10	PSMD14	SEM1	PSMC1	PSMA6	PSMA2	PSMD9
M_4	HLA-G	HLA-B	HLA-E	HLA-C	HLA-A	HSPA5	CANX	HLA-F
M_5	PLC	B2M	CALR	PDIA3	BCAP31	TAPBP	TAP1	TAP2	MIR5093	H1-9P	GORAB	ERAP1	ERAP2
M_6	HLA-DQA2	AREG	HLA-DQB1	SEC31A	GOSR2	VTI1B	SEC13	LMAN1	HLA-DRB4	APP	SREBF1	SEC23IP	HLA-DQA1	SEC24B	SAR1B	HLA-DQB2	VTI1A	CNIH	KIAA0368	TMED10	CTSC	YIPF5	HLA-H	TEX261	HLA-DRB3	VANGL2	SEC23A	F5	SEC24A	SCAP	KLHL12	HLA-DRB5	CNIH3	STX5	HLA-DPA1	SEC22B	HLA-DRA	MCFD2	HLA-DPB1	SEC24D	SERPINA1	PCSK9	CNIH2	SEC24C	CD59	F8	SEC23B	COL7A1	LMAN2L
M_7	BBS1	RAB31	GCC2	GOLGA7	KRT18	VAMP5	EXOC2	CCDC93	ARFRP1	SPTBN1	C16orf62	EXOC1	OSBPL5	SYS1	MACF1	VAMP7	ARFGEF2	VAMP4	GOLPH3	KIF13A	RAB3IP	STEAP2	AMN	GOLGA4	BLZF1	ANK3	OPTN	LLGL1	COMMD1	BBS2	DNM2	CHIC2	GOPC	STXBP6	CCDC22	VAMP3	NSF	VAMP2	RAB10	RAB26	RAB34
M_8	BRAF	MAL2	ARF6	RAB35
M_9	CCL5	CD3D	CD7	CD8A	CST7	CTSW	GZMA	GZMB	GZMH	GZMM	NKG7	PRF1	CCR5	CD2	CD247	CD27	CD3E	CD3G	CD6	CD8B	CD96	CXCR3	FASLG	GRAP2	GZMK	ICOS	IKZF3	IL2RB	LCK	PYHIN1	SH2D1A	SIRPG	SIT1	SLA2	TBX21	TIGIT	UBASH3A	ZAP70
[truncated: 44 more columns]
