# Supplementary material for: A physics informed neural network approach to quantify antigen presentation activities at single cell level using omics data
Source: Research Square preprint supplement (doi:10.21203/rs.3.rs-5629379/v1), 2025-01-17
Supplement: Supplementary file 6 [file f061a5b197b5215dd5169c12.xlsx]

## Sheet: Supplementary Table S4
Number of spatial spots fall into different regions with respect to the MHC class I antigen presentation and T cell infiltration level.
	Human_Prostate	Human_Skin_Melanoma	HumanbreastV1	GSE206552_meta2	GSE206552_meta4
HL_counts	677	371	593	971	157
LH_counts	225	122	322	797	98
All_counts	3460	3458	3798	3776	1537
